**Title:** Soil type shapes unique pathogen communities on nearby populations of a California native bunchgrass

**Authors:**

Johannah E. Farner<sup>1</sup>, Erin R. Spear<sup>1,2</sup>, Erin A. Mordecai<sup>1,3</sup>

<sup>1</sup>Biology Department, Stanford University, Stanford, California 94305 USA

<sup>2</sup>Biology Department, Regis University, Denver, Colorado 80221 USA

<sup>3</sup>E-mail: emordeca@stanford.edu

**Abstract**

The role of infectious disease in regulating host populations is increasingly recognized, but the environmental conditions that facilitate versus hinder pathogen-mediated population regulation remain poorly understood. We compared the relative contributions of soil type and pathogen community composition to foliar disease burden in a perennial bunchgrass species found on two distinct soil types that support distinct plant communities in a California grassland. We hypothesized that populations on different soil types would have significantly different disease burdens caused by unique pathogen communities. To test this hypothesis, we compared foliar disease burden and foliar fungal pathogen communities in nearby populations of *Stipa pulchra* found in nonserpentine greenstone soil that is dominated by invasive Mediterranean grasses, and in serpentine soil, a harsh soil high in heavy metals and low in essential nutrients that supports a diverse community of native plant species. We analyzed the chemical makeup of serpentine and nonserpentine plant tissue to understand potential impacts of soil chemistry on plant health and pathogen community composition. We found that serpentine and nonserpentine *S. pulchra* experienced consistent, low disease pressure caused by distinct communities of foliar pathogens, and that serpentine plants, like the soil in which they grew, had elevated Ni and Mg

content and decreased C, N, Ca, and P content compared to nonserpentine plants. The results imply that pathogens are unlikely to regulate the population dynamics of this native plant, and that pathogen communities are structured either by plant community composition or tissue chemistry. Local variation in soil type and annually variable conditions associated with high species turnover in pathogen communities may create a refuge from disease outbreaks for *S. pulchra*, contributing to the low disease burden observed on this and other Mediterranean grassland species.

## Introduction

How environmental heterogeneity affects species interactions, and ultimately population growth, remains a fundamental ecological question. Infectious disease, which arises from interactions between hosts, parasites, and the environment, is particularly likely to vary across populations in differing environments. Both biotic factors, such as the phylogenetic structure of the host community, and abiotic factors, such as elevation, have been associated with the presence of specific diseases and the severity of their impacts on their hosts (Abbate and Antonovics 2014, Parker et al. 2015). Additionally, mounting evidence suggests that specific characteristics of pathogen community structures, including the identities and abundances of the diseases present in a host population, mediate the outcomes of host – pathogen interactions (Seabloom et al. 2015, Borer et al. 2016). Together, these observations highlight the importance of understanding interactions between environmental variation, pathogen community composition, and pathogen pressure on host populations to assess the potential for disease to regulate host population dynamics. For plant hosts, such assessments are important both in conservation and agricultural contexts because identifying populations at high risk for severe disease outbreaks and applying preventative measures may prevent local species extinctions and improve crop yields, respectively. While studies have frequently explored the interactions of

single host – pathogen pairs under differing abiotic conditions (e.g., Abbate and Antonovics 2014) or the effect of varying pathogen community composition on disease burden (e.g., Telfer et al. 2010), relationships between abiotic variables and pathogen community structures remain largely unexplored in natural systems (but see Spear 2017).

California grasslands are an ideal model system in which to study interactions between environmental variation, pathogen community composition, and disease burden because these plant communities are widespread, exist across a variety of environmental gradients, and include distinct plant community subtypes (Eviner 2016). Here, we take advantage of the natural occurrence of the native perennial bunchgrass *Stipa pulchra* on distinct soil types—serpentine, hosting diverse, native-dominated grassland communities and a nonserpentine greenstone (hereafter, nonserpentine), dominated by exotic plants—to understand the extent to which soil type and time influence the landscape of disease encountered by a single plant species, including foliar fungal pathogen community composition and disease severity.

Differences in plant community composition and soil chemistry suggest that *S. pulchra* populations growing in distinct soil types are likely to host distinct fungal pathogen communities and/or experience differing disease burdens, particularly if the phenotype of *S. pulchra* is influenced by the soil in which it grows. *S. pulchra* naturally occurs in both nonserpentine soils and in relatively rare serpentine soils that host grassland plant communities. These two soil types differ in their chemistry and host distinct plant communities, resulting in a suite of environmental differences that may influence pathogen infection, reproduction, and persistence (Huenneke et al. 1990, Harrison and Viers 2007). In contrast to the majority of California grasslands, which are heavily invaded by exotic species, serpentine grasslands have a diverse array of native species adapted to chemically and physically harsh soils: low in essential plant nutrients (N, P, K, Ca), high in heavy metals that are potentially toxic to plants (Co, Ni, Cr, Fe), and rocky and shallow,

with poor moisture retention (Proctor and Woodell 1975, Oze et al. 2004, 2008, McNaughton 1968, Harrison and Viers 2007, Eviner 2016).

Soil properties determine a variety of factors likely to influence the occurrence and outcomes of plant infections, including soil moisture levels and plant chemistry and physiology (Cunningham et al. 1999, McElrone et al. 2005, Smith 2007). Spores of different fungal species vary in both their ability to survive in dry and moist environments and their tolerance of heavy metals (Coley-Smith and Cooke 1971, Iram et al. 2009). Moreover, plants of the same species grown in drier and lower-nutrient soils can have thicker epidermises and higher concentrations of phenolic compounds, many of which have antifungal properties (Osbourne 1996, Cunningham et al. 1999). Finally, soil chemistry may influence pathogen infection either through hyperaccumulation of heavy metals, which can bolster chemical defenses against natural enemies, or by limiting common mechanisms of plant defense (Springer et al. 2006, Rascio and Navari-Izzo 2011).

In this study, we ask: (1) how does disease burden differ on plants growing in different soil types? (2) how does the species composition of pathogen communities differ on plants growing in different soil types? and (3) by what mechanisms—including host community composition and plant tissue chemistry—does soil type affect disease burden and pathogen composition? We hypothesize that both disease burden and pathogen species composition differ on *S. pulchra* individuals growing in serpentine versus nonserpentine soils, either because of differences in the composition of the surrounding plant community, differences in plant physiological responses, or both. We further hypothesize that the soil type *S. pulchra* grows in alters foliar tissue chemistry in ways that may affect disease burden, with higher heavy metal content and/or lower C, N, and P content in serpentine plants. If so, these foliar chemistry differences may translate into either (a) higher disease in serpentine plants relative to

nonserpentine plants, facilitated by negative impacts of limited plant resource availability on plant health (as in Springer 2006), or (b) lower disease in serpentine plants due to heightened chemical and/or physiological plant defenses in response to serpentine soil properties. The results of this study will aid in assessing disease risk for plant populations in natural and agricultural contexts by providing information about the spatial and temporal scales over which soil type and other environmental factors can affect the spread of outbreaks.

## Methods

All surveys and sample collection took place at Jasper Ridge Biological Preserve (JRBP), a 485-hectare site in San Mateo County, CA managed by Stanford University (37.4° N, 122.2° W). JRBP has a Mediterranean climate with cool winters (mean 9.2°C), warm summers (mean 20.1°C), and annually variable precipitation that predominantly occurs in the winter and spring (averaging 622.5 mm per year) (Ackerly et al. 2002). The growing season occurs during the rainy season and plants senesce in the early summer. This study was conducted during the growing seasons from mid-April to mid-May in 2015, 2016, and 2017. There was highly variable annual precipitation across the three years (491 mm, 604 mm, and 985mm in 2015, 2016, and 2017, respectively; Weather Underground).

Substantial populations of *S. pulchra* occur in both serpentine and nonserpentine grasslands at JRBP (McNaughton 1968). The serpentine plant communities at JRBP are more diverse than the nearby nonserpentine plant communities and include many native grasses and forbs, in contrast to the invasive-dominated nonserpentine grasslands (McNaughton 1968). Plant species commonly found in serpentine grasslands at JRBP include *Stipa pulchra*, *Elymus glaucus*, *Elymus multisetus*, *Eschscholzia californica*, and the invasive grass *Bromus hordeaceus* (McNaughton 1968, Hobbs and Mooney 1985). The nonnative annual species that dominate the nonserpentine grasslands but are absent from serpentine grasslands include *Avena barbata*,

*Avena fatua*, *Bromus diandrus*, and *Erodium botrys* (McNaughton 1968, Hobbs and Mooney 1985).

# *Quantification of disease*

To assess plant disease burden, we quantified the percentage of living leaf area exhibiting symptoms of fungal disease in serpentine and nonserpentine populations of *S. pulchra*. We selected three serpentine grassland sites and three nonserpentine grassland sites such that each serpentine site was paired with a nearby (~170m away) nonserpentine site. Individual sites within each soil type were >300m apart. Each year, we randomly placed four 5-meter transects at each site and assessed the infection status of the *S. pulchra* individual nearest each meter mark, resulting in five individual plants per transect surveyed each year (N = 60 plants per soil type per year). We visually estimated the percentage of living foliar tissue damaged by pathogens for six arbitrarily-selected leaves per plant. All survey sites were located along the ridgetop at JRBP, where serpentine and nonserpentine (greenstone) soils are present in discrete adjacent bands (Figure 1a, Oze et al. 2004). The relative flatness of the ridgetop ensured that all survey sites were at roughly the same elevation and had similar slopes, aspects, and water availability (Oze et al. 2008).

We compared the mean percentage of diseased leaf area and proportion of surveyed leaves with disease in serpentine and nonserpentine *S. pulchra* using Welch's two-tailed t-tests for the data over all years. We used analysis of variance (ANOVA) to test for the effects of year on disease levels in serpentine and nonserpentine *S. pulchra*. When ANOVA results were statistically significant, we used pairwise t-tests with Bonferroni adjustments of p-values to account for multiple comparisons to identify the interactions contributing to the significant result.

# *Isolation and molecular identification of foliar fungal pathogens*

To identify the fungal foliar pathogens infecting serpentine and nonserpentine *S. pulchra*, we harvested one segment of symptomatic leaf tissue for culturing and identification of the causative fungal pathogen(s) from each surveyed individual with disease. We excised, surface sterilized, and plated a 2mm<sup>2</sup> square of tissue from each sample at the leading edge of infection. We observed the plates for growth for eight weeks and isolated morphologically distinct hyphae into axenic culture. We extracted and sequenced genomic DNA from the ITS region for each isolate. Fungal isolation and sequencing methods followed Spear and Mordecai (2018). We estimated taxonomic placement of fungal isolates by grouping sequences into operational taxonomic units with 97% sequence similarity (OTUs), a proxy for species delineation based on the range of intraspecific ITS divergence (O'Brien et al. 2005), and then comparing assembled DNA sequences to the entries in the UNITE fungal database (see Supplemental Information for additional details).

## *Analyses of fungal community composition*

To characterize pathogen community composition in serpentine and nonserpentine *S. pulchra* populations, we compared the diversity and assessed the similarity of communities of fungi cultured from the diseased tissue of surveyed plants. To describe fungal community diversity, we (1) calculated observed taxa richness and Fisher's alpha, a widely used measure of species richness that is robust to uneven sample sizes (Fisher et al. 1943, Magurran 1988, Hansen and Coleman 1998); (2) generated taxa accumulation curves to understand sampling efficacy; and (3) counted the number of fungal isolates in each genus, family, order, and class from each grassland type. We compared fungal community composition across grassland types and across years visually, using non-metric multidimensional scaling (NMDS), and statistically, using

permutational multivariate analyses of variance (PERMANOVA) with the Adonis and pairwise.perm.manova functions (Anderson 2001, Oksanen et al. 2016, Hervé 2017). To account for low sample size in some transects, we considered the combined isolates from two transects at each site in each year to be a distinct community (for a total of two communities per site per year) for these analyses. For the NMDS and PERMANOVA analyses, we used the function vegdist with the abundance-based Chao method, accounting for unsampled species, to create a matrix of pairwise community dissimilarities (Chao et al. 2016, Oksanen et al. 2016). Finally, we used the Morisita-Horn index, which is independent of sample size and diversity, to make pairwise comparisons of similarity within and between the serpentine and nonserpentine fungal communities from each year (N = 265 isolates, 200 bootstrap replicates) (Wolda 1981, Jost et al. 2011).

#### *Chemical analyses of leaf tissue*

We analyzed C, N, Ca, Cr, Mg, Ni, and P content of the foliar tissue of *S. pulchra* grown in serpentine and nonserpentine soils *in situ* and in pots. In 2016, we collected the youngest fully expanded and entirely asymptomatic leaf of each individual surveyed in the field (N = 58 nonserpentine, 60 serpentine). We dried the samples at room temperature for three months, then at 60°C for 48 hours, ground them to a powder, and then dried them again at 60°C for 24 hours. We measured C and N content of these samples with a Carlo Erba NA-1500 elemental analyzer using atropine standards.

To compare Ca, Cr, Mg, Ni, and P content, which requires more tissue biomass than could be collected from plants in the field, we used a set of plants grown in pots in the greenhouse and then moved to JRBP for a separate experiment (see Supplement for additional information). In total, we grew 480 plants in serpentine soil sourced from our survey sites at



JRBP and 480 plants in nonserpentine greenhouse soil (PROMIX HP Mycorrhizae TM High Porosity Professional Growing Medium, Premier Horticulture Inc.). To ensure that serpentine- and nonserpentine-grown plants encountered similar soil biota, we triple autoclave-sterilized serpentine soil (40-minute cycles at 120°C) and then immediately inoculated it with greenhouse soil in a ratio of 93:7 by weight (serpentine soil treatment; Heinze et al. 2015) and mixed sterilized serpentine soil into greenhouse soil in the same ratio (nonserpentine soil treatment, to account for possibility of microorganisms surviving autoclaving). Autoclave sterilization of soil has been shown to alter physical and chemical properties and thus has the potential to affect our results. However, the documented instances of autoclaving-induced changes to extractable levels of the elements we measured, including increased extractable Ca:Mg and decreased extractable Ni, suggest that this procedure is more likely to increase than decrease the similarity of nutrient availability in serpentine and nonserpentine soils (Tadros 1957, Wolf et al. 1989, Abou-Shanab et al. 2003). Therefore, any significant differences observed between the foliar chemistry of *S. pulchra* grown in autoclaved serpentine and unsterilized nonserpentine soils that indicate plant tissue chemistry matching soil chemistry should not be due to autoclave sterilization effects.

Elemental content of these plants was measured via inductively coupled plasma optical emission spectrometry (ICP-OES). Because the minimum amount of leaf tissue for which some heavy metals can be detected via ICP-OES is 0.5g and most of our *S. pulchra* had a total aboveground biomass of less than 0.5g, each measurement represents the combined elemental content of equal weights of oven-dried foliar tissue from two plants. Plants were randomly selected for analysis from among all individuals with an aboveground biomass of at least 0.29g. All asymptomatic leaves were removed from each plant's base and processed as described above. A 0.5g portion of each pooled sample was digested in 10ml of 70% trace metal quality

nitric acid with microwave assistance. Digested samples were diluted to 16.7% acid concentration with DI water and the concentrations of Ca, Cr, Mg, Ni, and P were measured in parts per billion by a Thermo Scientific iCAP 6300 spectrometer (Thermo Scientific, Waltham, MA, USA) (Cantarelli et al. 2010).

To assess the potential for soil chemistry to mediate plant-pathogen interactions, we related soil type to leaf tissue chemistry of *in situ* and potted *S. pulchra*, and chemistry of *in situ* plants to disease burden. We compared the mean mol/kg dried weight of leaf tissue for Ca, Cr, Mg, and Ni for potted serpentine and nonserpentine plants with Wilcoxon rank sum tests. We also compared mean C:N and Ca:Mg ratios that are indicative of plant health (Ciompi et al. 1996, Brady et al. 2005). We used Pearson's product-moment correlation to test for significant monotonic relationships between the amount of diseased tissue observed on individual plants in the field and their foliar C and N content.

All statistical analyses were done in R version 3.4.1. We used the packages ggplot2 (Wickham 2016), vegan (Oksanen et al. 2016), SpadeR (Chao et al. 2016), bipartite (Dormann et al. 2008), fossil (Vavrek 2011), BiodiversityR (Kindt and Coe 2005), rich (Rossi 2011), and RVAideMemoire (Hervé 2017).

## Results

### *Pathogen damage*

Pathogen damage was similarly ubiquitous and low-burden in serpentine and nonserpentine soils. Every plant surveyed exhibited evidence of foliar fungal-caused disease. The mean percentage of diseased leaf area observed across all years was 1.66 for nonserpentine and 1.63 for serpentine *S. pulchra*, respectively ( $t = 0.11$ ,  $df = 356.2$ ,  $p\text{-value} = 0.91$ ; Figure 1b), and the mean proportion of pathogen-damaged leaves was 0.83 for both soil types. Although the

percentage of diseased tissue on serpentine plants increased slightly each year from 2015 to 2017 (F-value = 4.49, p-value = 0.035), the Bonferroni-adjusted p-values for t-tests for each pair of years were not statistically significant (p-values = 0.16, 0.45, 1.00). There was no statistically significant effect of year on nonserpentine pathogen damage (F-value = 1.35, p-value=0.246).

### *Fungal pathogen community*

We isolated 267 unique fungal isolates from 258 symptomatic tissue pieces with fungal growth (144 nonserpentine, 114 serpentine from 36 nonserpentine and 34 serpentine transects, out of 360 total tissue pieces). Of the 267 unique fungal isolates, we successfully sequenced 256 isolates. The sequenced isolates clustered into 30 operational taxonomic units (OTUs) based on 97% sequence similarity, representing 23 genera, 15 families, 8 orders, and 5 fungal classes. The largest OTU contained 48 isolates and the smallest OTUs consisted of one isolate each. OTUs are hereafter referred to as “species” (O’Brien et al. 2005).

The serpentine fungal community was more diverse than the nonserpentine community at every taxonomic level (Tables S-1 to S-6). Twenty-two fungal species were isolated from nonserpentine (Fisher’s alpha = 7.261, 95% CI = 3.597, 10.925) and 24 from serpentine *S. pulchra* (Fisher’s alpha = 9.324, 95% CI = 4.664, 13.983); 16 of these species (53%) were shared (Figure 2, Tables 1 and S-1). Novel genera were isolated for both community types in every year of surveying (Table S-6). Species accumulation curves did not approach horizontal asymptotes for either soil type, and the serpentine curve had a steeper slope than the nonserpentine curve (Figure S-1). These curves suggest that neither fungal community was fully described, and that there were more unsampled fungal species associated with the plants growing in serpentine soil than those in nonserpentine.

Both fungal communities were dominated by a few abundant species (isolated >10 times), but the numerically dominant species differed between nonserpentine and serpentine soils: *Alternaria* sp. 2 and *Ramularia* sp., respectively (Figure S-2, Table S-1). The nonserpentine community included five abundant species, representing 62% of the isolates, while the serpentine community included two abundant species, representing 51% of serpentine isolates (Figure S-2, Table S-1). The serpentine community had a higher proportion of rare species (<3 isolates) than the nonserpentine community, 63% versus 36%, respectively. One *Drechslera* species was abundant in the nonserpentine community and rare in the serpentine (Table S-1).

Soil type significantly affected pathogen community composition, based on pairwise PERMANOVA analysis of two-transect fungal communities and NMDS visualization of community similarity ( $F = 4.585$ ,  $R^2 = 0.07567$ ,  $p = 0.001$ ; Figure 3). Serpentine fungal communities were generally more similar to one another than they were to nonserpentine fungal communities, and vice versa (Figure 3, Table 1).

Serpentine fungal community composition was more consistent across years than nonserpentine fungal community composition (Table 1). While nonserpentine fungal community similarity was unpredictable between years, with some very dissimilar communities (Morisita-Horn overlap = 0.295) and some very similar ones (Morisita-Horn overlap = 0.882), serpentine fungal communities were always relatively similar between years, with Morisita-Horn overlap ranging from 0.707 to 0.786. Morisita-Horn overlap for nonserpentine and serpentine fungal communities in each year was also variable, ranging from 0.535 to 0.725.

### *Leaf tissue chemistry and disease burden*

As expected from soil chemistry differences, leaf chemistry in plants grown on serpentine versus nonserpentine soil differed in mean C, N, Ca, Mg, Ni, and P content, and in Ca:Mg ratio.

Serpentine plants had significantly lower mean Ca, C, N, and P content and Ca:Mg ratio than nonserpentine plants and significantly higher Ni and Mg (Table S-7, Figure 4). Cr content and C:N ratio were similar for both soil types. Nitrogen content in asymptomatic foliar tissue from plants surveyed in the field was positively related to the percentage of diseased tissue observed for nonserpentine, but not serpentine plants, based on Pearson's product-moment correlation (for N: nonserpentine cor. = 0.328, p-value = 0.012, serpentine cor. = -0.19, p-value = 0.14; for C: nonserpentine cor. = 0.08, p-value = 0.53, serpentine cor. = -0.04, p-value = 0.76) (Figure 5).

## Discussion

Here we show that a diverse suite of pathogens caused ubiquitous, low-grade damage on host individuals across growing seasons and environmental conditions, and that plant populations and communities appeared to shape the diversity and composition of fungal pathogen communities in this system. The consistent presence of low-grade foliar disease in *S. pulchra* and evidence from recent work suggesting that these symptoms inflict only minimal plant fitness costs (Spear and Mordecai 2018, Uricchio et al. 2018) imply a coevolutionary relationship between *S. pulchra* and its foliar pathogens that has led to plant-fungal interactions nearer the commensal than the parasitic end of the symbiotic spectrum. This finding contrasts with prevalent hypotheses that disease plays a major role in structuring plant communities by regulating host population dynamics through mechanisms including enemy escape effects, density- or distance-dependent Janzen-Connell effects, and epidemic-driven community shifts (Janzen 1970, Connell J.H. 1971, Day and Monk 1974, Keane and Crawley 2002, Mitchell and Power 2003, Petermann et al. 2008, Mordecai 2011). While evidence from tropical climates supports these hypotheses (Mangan et al. 2010, Bagchi et al. 2014, Spear et al. 2015), this study adds to a small body of literature from Mediterranean and semi-arid grasslands that indicates little to no role for such mechanisms (Mordecai 2013, Spear and Mordecai 2018, Uricchio et al.

2018). However, we did not address pathogens with potential for more direct impacts on plant survival and fecundity, such as flower, seed, and seedling pathogens (Gilbert 2002).

As predicted, the chemical composition of *S. pulchra* reflected the chemistry of the soil in which it grew (except for Cr levels) (Oze et al. 2008) (Figure 4, Table S-7). Contrary to our hypothesis, differences in soil chemistry that extended to plant chemistry did not affect disease burden (Figures 1 and 4, Table S-6). Elevated heavy metal content in serpentine-grown plants was far below “hyperaccumulation” levels that have been shown to inhibit pathogenic infection in plants (e.g.,  $1.92 \times 10^{-2}$  mol Cr/kg required for hyperaccumulation versus  $3.30 \times 10^{-4}$  mol Cr/kg observed in serpentine *S. pulchra*) (Jaffre et al. 1976, Brooks et al. 1977, Boyd et al. 1994, Martens and Boyd 1994, Table S-7), but the consistently low disease burden observed in both soil types suggests that *S. pulchra* is able to effectively resist or suppress damage by foliar pathogens such that heightened defenses via opportunistic hyperaccumulation would provide little to no fitness benefit.

This study provides some of the first evidence that local growing conditions influence structure of the pathogen communities of a single host species even over relatively small spatial scales of a few hundred meters (Figure 1a, Figure 3). The close proximity of the sampled nonserpentine and serpentine plants suggests that environmental filtering, rather than dispersal limitation, plays a key role in fungal community assembly. We hypothesize that either tissue chemistry, plant community composition, or both influence the composition of fungal communities and their variation across environments.

Differing heavy metal content in the leaves of nonserpentine and serpentine *S. pulchra* may influence fungal community assembly through a variety of mechanisms. Soil Ca content is known to influence the outcomes of plant-pathogen interactions through its roles in cellular and

biochemical pathways in both the plant immune system (Lamb et al. 1989, Levine et al. 1996, Blumwald et al. 1998, Romeis et al. 2001) and fungal pathogen virulence, growth, and reproduction (Magalhães et al. 1991, Warwar and Dickman 1996, Lee and Lee 1998, Sebghati et al. 2000, Shaw and Hoch 2000, Uhm et al. 2003, Brandhorst et al. 2005). Fungal pathogen interspecific variation in reliance on Ca for successful infection and/or fungal response to Ca-dependent plant immune defenses could therefore explain differences in nonserpentine and serpentine fungal community composition. Previous studies showed that *Hesperolinon* sp. infection frequency and severity by the fungal rust *Melampsora lini* in California grasslands depended on plant tissue Ca levels linked to serpentine soil chemistry (Springer et al. 2006, Springer 2009). Divergent tolerances of heavy metals other than Ca among fungi may act as additional filters on the species present in nonserpentine and serpentine communities (Iram et al. 2009).

Differences in nonserpentine and serpentine fungal communities may also result from differences in the plant community. Serpentine *S. pulchra* pathogen communities were more diverse than nonserpentine communities at the species, genus, family, order, and class levels (Tables S-1 through S-6). Results from previous studies that demonstrate a positive relationship between host diversity and pathogen diversity indicate that higher plant species diversity in serpentine grasslands might contribute to higher fungal diversity if native forbs and bunchgrasses that specialize on serpentine soils share foliar fungal pathogens with *S. pulchra* (Hechinger and Lafferty 2005, Kamiya et al. 2014, Spear 2017). Research on five common invasive and native grasses (including *S. pulchra*) at JRBP shows that multi-host foliar fungal pathogens dominate this system, supporting this hypothesis (Spear and Mordecai 2018).

Alternatively, serpentine and nonserpentine fungal communities could differ due to genetic divergence between the *S. pulchra* populations found in these soils. The gene-for-gene

model of the evolution of virulence hypothesizes that a given pathogen can infect a given host only if the pathogen does not possess an avirulence gene recognized by a matching resistance gene in the host (Flor 1956, Parker and Gilbert 2004). To date, there have been few studies of genetic differences between serpentine and nonserpentine populations of the same plant species. However, genetic and chemical analyses of serpentine and nonserpentine populations of the native forb *Lasthenia californica* at JRBP show that these populations represent two phylogenetically distinct species and that each species both accumulates ions in significantly different concentrations and has a unique flavonoid profile (Desrochers and Bohm 1993, Rajakaruna and Bohm 1999, Chan et al. 2002, Rajakaruna et al. 2003). Since many flavonoids have antifungal properties, serpentine and nonserpentine *S. pulchra* could also contain different genotypes with different potential for resistance to any given fungus due to divergent resistance gene and/or flavonoid profiles (Parker and Gilbert 2004, Treutter 2006).

Species turnover between years contributed substantially to fungal diversity (Table 1, Table S-6, Figure 3), and species accumulation curves suggest that many more fungal species remain to be discovered in this system (Figure S-1). Between-year variation in these communities may be due to highly variable annual precipitation (2015 rainfall = 491mm; 2016 = 604mm, 2017 = 985mm) (Weather Underground). Timing and amount of precipitation might alter infection dynamics by washing away fungal spores, transmitting spores to new hosts, and/or influencing plant community composition (Hobbs and Mooney 1991, Madden 1997). The year-to-year dissimilarity of fungal pathogen communities hosted by *S. pulchra* in both serpentine and nonserpentine soils highlights the necessity of long-term data collection to accurately characterize plant-disease interaction networks. This temporal variability also points to the potential importance of the storage effect, in which temporally variable environmental conditions act as ecological niches that facilitate species diversity, in maintaining diverse fungal



communities in California grasslands (Warner and Chesson 1985).

The variation in fungal community composition we observed on a single host species with soil chemistry and over time suggests possible mechanisms preventing foliar disease from regulating plant host populations in California grasslands. Transitions between distinct soil types over spatial scales within the range of fungal spore dispersal may prevent disease outbreaks by hampering the spread of pathogens that are more or less virulent depending on leaf tissue chemistry. Variable climatic conditions favoring successful infection by different fungal species each growing season (Table S-6), combined with plant senescence during the dry season each year, suggest temporal barriers to pathogens evolving high virulence on both nonserpentine and serpentine plants. The processes that limit disease burden and impact in *S. pulchra* suggest that climate and growth form may explain differences with previous studies that reported larger pathogen impacts. For example, seasonal senescence and local environmental barriers to transmission in semi-arid and Mediterranean systems may limit the severity of individual pathogen outbreaks, in contrast to year-round suitable climates and potentially more homogenous biotic and abiotic environments in tropical systems. Life histories that promote the accumulation of large disease burdens, along with relatively high and constant humidity, may be important determinants of the potential for fungal pathogens to structure plant communities.

Clarifying the specific mechanisms that drive differences in serpentine and nonserpentine fungal communities will require inoculation experiments to test how plant susceptibility to infection by different fungal species changes with plant tissue chemistry and plant genetics. Additionally, characterization of comprehensive plant-pathogen networks including all plant species co-occurring with *S. pulchra* in serpentine and nonserpentine grasslands will improve our understanding of the role of the surrounding plant community in structuring fungal pathogen communities.

# Conclusions

Fungi associated with foliar disease in the native bunchgrass *S. pulchra* are relatively benign and are unlikely to maintain the diversity of grassland plants, but contribute substantially to the overall biodiversity of California grasslands. The high taxonomic diversity and rarity of serpentine fungi demonstrates that this community is potentially at risk of species loss via host-parasite coextinction as annual grasses continue to expand their ranges at the cost of native plants, and human activities including development and increased C and N deposition contribute to the loss of serpentine grasslands that already make up <2% of the California's surface area (Huenneke et al. 1990, Vallano et al. 2012). This work demonstrates that, in addition to >200 endemic plant species, California's serpentine grasslands support unique communities of symbiotic fungi, providing additional motivation for active conservation of native grassland communities based on the far-reaching loss of biodiversity across trophic levels associated with their disappearance (Sprent 1992, Dobson et al. 2008, Dunn et al. 2009, Lafferty 2012).

# Acknowledgements

We thank Nona Chiariello, Caroline Daws, Joe Wan, Peter Vitousek, Scott Fendorf, Lawrence Uricchio, Guangchao Li, Douglas Turner, Virginia Walbot, Cody Hamilton, and the Mordecai and Peay Lab Groups for their help. This work was supported by the Jasper Ridge Kennedy Endowment, the National Science Foundation (DEB-1518681), Stanford Vice Provost for Undergraduate Education, and Stanford Bio-X.

# References

- Abbate, J. L., and J. Antonovics. 2014. Elevational disease distribution in a natural plant–pathogen system: insights from changes across host populations and climate. *Oikos* 123:1126–1136.
- Abou-Shanab, R. A., J. S. Angle, T. A. Delorme, R. L. Chaney, P. Van Berkum, H. Moawad, K. Ghanem, and H. A. Ghazlan. 2003. Rhizobacterial effects on nickel extraction from soil and uptake by *Alyssum murale*. *New Phytologist* 158:219–224.
- Ackerly, D. D., C. A. Knight, S. B. Weiss, K. Barton, and K. P. Starmer. 2002. Leaf size, specific leaf area and microhabitat distribution of chaparral woody plants: Contrasting patterns in species level and community level analyses. *Oecologia* 130:449–457.
- Anderson, M. J. 2001. A new method for non-parametric multivariate analysis of variance. *Austral Ecology* 26:32–46.
- Bagchi, R., R. E. Gallery, S. Gripenberg, S. J. Gurr, L. Narayan, C. E. Addis, R. P. Freckleton, and O. T. Lewis. 2014. Pathogens and insect herbivores drive rainforest plant diversity and composition. *Nature* 506:85–88.
- Blumwald, E., G. S. Aharon, and B. C-H. Lam. 1998. Early signal transduction pathways in plant-pathogen interactions. *Trends in Plant Science* 3:342–346.
- Borer, E. T., A. Laine, and E. W. Seabloom. 2016. A multiscale approach to plant disease using the metacommunity concept. *Annual Review of Phytopathology* 54:397–418.
- Boyd, R. S., J. J. Shaw, and S. N. Martens. 1994. Nickel hyperaccumulation defends *Streptanthus polygaloides* (Brassicaceae) against pathogens. *American Journal of Botany*

81:294–300.

Brady, K. U., A. R. Kruckeberg, and H. D. Bradshaw Jr. 2005. Evolutionary ecology of plant adaptation to serpentine soils. *Annual Review of Ecology, Evolution, and Systematics* 36:243–266.

Brandhorst, T. T., G. M. Gauthier, R. A. Stein, and B. S. Klein. 2005. Calcium binding by the essential virulence factor BAD-1 of *Blastomyces dermatitidis*. *Journal of Biological Chemistry* 280:42156–42163.

Brooks, R. R., J. Lee, R. D. Reeves, and T. Jaffre. 1977. Detection of nickeliferous rocks by analysis of herbarium specimens of indicator plants. *Journal of Geochemical Exploration* 7:49–57.

Cantarelli, M. A., R. G. Pellerano, L. A. Del Vitto, E. J. Marchevsky, and J. M. Camiña. 2010. Characterisation of two South American food and medicinal plants by chemometric methods based on their multielemental composition. *Phytochemical Analysis* 21:550–555.

Chan, R., B. G. Baldwin, and R. Ornduff. 2002. Cryptic goldfields: A molecular phylogenetic reinvestigation of *Lasthenia californica* sensu lato and close relatives (Compositae: Heliantheae sensu lato). *American Journal of Botany* 89:1103–1112.

Chao, A., K. H. Ma, T. C. Hsieh, and C.-H. Chiu. 2016. SpadeR: Species prediction and diversity estimation with R.

Ciampi, S., E. Gentili, L. Guidi, and G. F. Soldatini. 1996. The effect of nitrogen deficiency on leaf gas exchange and chlorophyll fluorescence parameters in sunflower. *Plant Science* 118:177–184.

Coley-Smith, J. R., and R. C. Cooke. 1971. Survival and Germination of Fungal Sclerotia.

Annual Review of Phytopathology:65–92.

Connell J.H. 1971. On the role of natural enemies in preventing competitive exclusion in some marine animals and in rain forest trees. Dynamics of numbers in populations. Proceedings of the Advanced Study Institute. Centre for Agricultural Publication and Documentation, Wageningen, The Netherlands:298–312.

Cunningham, S. A., B. Summerhayes, and M. Westoby. 1999. Evolutionary divergences in leaf structure and chemistry, comparing rainfall and soil nutrient gradients. *Ecology* 69:569–588.

Day, F. P., and C. D. Monk. 1974. Vegetation patterns on a southern Appalachian watershed. *Ecology* 55:1064–1074.

Desrochers, A. M., and B. A. Bohm. 1993. Flavonoid variation in *Lasthenia californica* (Asteraceae). *Biochemical Systematics and Ecology* 21:449–453.

Dobson, A., K. D. Lafferty, A. M. Kuris, R. F. Hechinger, and W. Jetz. 2008. Homage to Linnaeus: how many parasites? how many hosts? *Proceedings of the National Academy of Sciences* 105:11482–11489.

Dormann, C. F., B. Gruber, and J. Fruend. 2008. Introducing the bipartite package: analysing ecological networks. *R news* 8:8–11.

Dunn, R. R., N. C. Harris, R. K. Colwell, L. P. Koh, and N. S. Sodhi. 2009. The sixth mass coextinction: are most endangered species parasites and mutualists? *Proceedings of the Royal Society B: Biological Sciences* 276:3037–3045.

Eviner, V. T. 2016. Grasslands. Pages 449–477 *Ecosystems of California*. University of California Press.

487 Fisher, R. A., A. S. Corbet, and C. B. Williams. 1943. The relation between the number of  
 488 species and the number of individuals in a random sample of an animal population. Source  
 489 Journal of Animal Ecology 12:42–58.

490 Flor, H. H. 1956. The complementary genic systems in flax and flax rust. Advances in Genetics  
 491 8:29–54.

492 Gilbert, G. S. 2002. Evolutionary ecology of plant diseases in natural ecosystems. Annual  
 493 Review of Phytopathology 40:13–43.

494 Hansen, R. A., and D. C. Coleman. 1998. Litter complexity and composition are determinants of  
 495 the diversity and species composition of oribatid mites (Acari: Oribatida) in litterbags.  
 496 Applied Soil Ecology 9:17–23.

497 Harrison, S. P., and J. H. Viers. 2007. Serpentine Grasslands. Pages 145–155 California  
 498 Grasslands: Ecology and Management. University of California Press.

499 Hechinger, R. F., and K. D. Lafferty. 2005. Host diversity begets parasite diversity: bird final  
 500 hosts and trematodes in snail intermediate hosts. Proceedings of the Royal Society B:  
 501 Biological Sciences 272:1059–1066.

502 Heinze, J., J. Bergmann, M. C. Rillig, and J. Joshi. 2015. Negative biotic soil-effects enhance  
 503 biodiversity by restricting potentially dominant plant species in grasslands. Perspectives in  
 504 Plant Ecology, Evolution and Systematics 17:227–235.

505 Hervé, M. "RVAideMemoire: testing and plotting procedures for biostatistics. . R. package  
 506 version 0. 9–6. (2017). 2017. RVAideMemoire: testing and plotting procedures for  
 507 biostatistics.

508 Hobbs, R. J., and H. A. Mooney. 1985. Community and population dynamics of serpentine

509 annual grassland in relation to gopher disturbances. *Oecologia* 67:342–351.

510 Hobbs, R. J., and H. A. Mooney. 1991. Effects of rainfall variability and gopher disturbance on  
511 serpentine annual grassland dynamics. *Ecology* 72:59–68.

512 Huenneke, L. F., S. P. Hamburg, R. Koide, H. A. Mooney, P. M. Vitousek, L. F. Huenneke, S. P.  
513 Hamburg, R. Koide, H. A. Mooney, and P. M. Vitousek. 1990. Effects of soil resources on  
514 plant invasion and community structure in Californian serpentine grassland. *Ecology*  
515 71:478–491.

516 Iram, S., I. Ahmad, B. Javed, S. Yaqoob, K. Akhtar, M. R. Kazmi, and Badar-uz-Zaman. 2009.  
517 Fungal tolerance to heavy metals. *Pakistan Journal of Botany* 41:2583–2594.

518 Jaffre, T., R. R. Brooks, J. Lee, and R. D. Reeves. 1976. *Sebertia acuminata*: a hyperaccumulator  
519 of nickel from New Caledonia. *Science* 193:579–580.

520 Janzen, D. H. 1970. Herbivores and the number of tree species in tropical forests. *The American*  
521 *Naturalist* 104:501–528.

522 Jost, L., A. Chao, and R. L. Chazdon. 2011. Compositional similarity and beta diversity. Page  
523 345 in A. E. Magurran and B. J. McGill, editors. *Biological diversity: frontiers in*  
524 *measurement and assessment*. Oxford University Press, Oxford, England.

525 Kamiya, T., K. O’Dwyer, S. Nakagawa, and R. Poulin. 2014. Host diversity drives parasite  
526 diversity: meta-analytical insights into patterns and causal mechanisms. *Ecography* 37:689–  
527 697.

528 Keane, R. M., and M. J. Crawley. 2002. Exotic plant invasions and the enemy release hypothesis.  
529 *Trends in Ecology and Evolution* 17:164–170.

530 Kindt, R., and R. Coe. 2005. *BiodiversityR*. Tree diversity analysis. A manual and software for

531 common statistical methods for ecological and biodiversity studies. World Agroforestry  
532 Centre (ICRAF), Nairobi.

533 Lafferty, K. D. 2012. Biodiversity loss decreases parasite diversity: Theory and patterns.  
534 Philosophical Transactions of the Royal Society B: Biological Sciences 367:2814–2827.

535 Lamb, C. J., M. A. Lawton, M. Dron, and R. A. Dixon. 1989. Signals and transduction  
536 mechanisms for activation of plant defenses against microbial attack. Cell 56:215–224.

537 Lee, S. C., and Y. H. Lee. 1998. Calcium/calmodulin-dependent signaling for appressorium  
538 formation in the plant pathogenic fungus *Magnaporthe grisea*. Molecules & Cells 8:698–  
539 704.

540 Levine, A., R. I. Pennell, M. E. Alvarez, R. Palmer, and C. Lamb. 1996. Calcium-mediated  
541 apoptosis in a plant hypersensitive disease resistance response. Current Biology 6:427–437.

542 Madden, L. V. 1997. No effects of rain on splash dispersal of fungal pathogens. Canadian  
543 Journal of Plant Pathology 19:225–230.

544 Magalhães, B. P., R. Wayne, R. A. Humber, E. J. Shields, and D. W. Roberts. 1991. Calcium-  
545 regulated appressorium formation of the entomopathogenic fungus *Zoophthora radicans*.  
546 Protoplasma 160:77–88.

547 Magurran, A. E. 1988. Ecological diversity and its measurement. Chapman & Hall.

548 Mangan, S. A., S. A. Schnitzer, E. A. Herre, K. M. L. MacK, M. C. Valencia, E. I. Sanchez, and  
549 J. D. Bever. 2010. Negative plant-soil feedback predicts tree-species relative abundance in a  
550 tropical forest. Nature 466:752–755.

551 Martens, S. N., and R. S. Boyd. 1994. The ecological significance of nickel hyperaccumulation:  
552 a plant chemical defense. Oecologia 98:379–384.



553 McElrone, A. J., C. D. Reid, K. A. Hoyer, E. Hart, and R. B. Jackson. 2005. Elevated CO<sub>2</sub>  
554 reduces disease incidence and severity of a red maple fungal pathogen via changes in host  
555 physiology and leaf chemistry. *Global Change Biology* 11:1828–1836.

556 McNaughton, S. J. 1968. Structure and function in California grasslands. *Ecology* 49:962–972.

557 Mitchell, C. E., and A. O. Power. 2003. Release of invasive plants from fungal and viral  
558 pathogens. *Nature* 421:625–627.

559 Mordecai, E. A. 2011. Pathogen impacts on plant communities: unifying theory, concepts, and  
560 empirical work. *Ecological Monographs* 81:429–441.

561 Mordecai, E. A. 2013. Consequences of pathogen spillover for cheatgrass-invaded grasslands:  
562 coexistence, competitive exclusion, or priority effects. *The American Naturalist* 181:737–  
563 47.

564 O’Brien, H. E., J. L. Parrent, J. A. Jackson, J. Moncalvo, and R. Vilgalys. 2005. Fungal  
565 community analysis by large-scale sequencing of environmental samples. *Applied and  
566 Environmental Microbiology* 71:5544–5550.

567 Oksanen, J., R. Kindt, P. Legendre, and B. O’Hara. 2016. *Vegan: community ecology package*.

568 Osbourne, A. E. 1996. Preformed antimicrobial compounds and plant defense against fungal  
569 attack. *The Plant Cell* 8:1821–1831.

570 Oze, C., S. Fendorf, D. K. Bird, and R. G. Coleman. 2004. Chromium geochemistry in  
571 serpentinized ultramafic rocks and serpentine soils from the Franciscan complex of  
572 California. *American Journal of Science* 304:67–101.

573 Oze, C., C. Skinner, A. W. Schroth, and R. G. Coleman. 2008. Growing up green on serpentine  
574 soils: biogeochemistry of serpentine vegetation in the Central Coast Range of California.

575       Applied Geochemistry 23:3391–3403.

576   Parker, I. M., and G. S. Gilbert. 2004. The evolutionary ecology of novel plant-pathogen  
577       interactions. *Annual Review of Ecology, Evolution, and Systematics* 35:675–700.

578   Parker, I. M., M. Saunders, M. Bontrager, A. P. Weitz, R. Hendricks, R. Magarey, K. Suiter, and  
579       G. S. Gilbert. 2015. Phylogenetic structure and host abundance drive disease pressure in  
580       communities. *Nature* 520:542–544.

581   Petermann, J. S., A. J. F. Fergus, L. A. Turnbull, and B. Schmid. 2008. Janzen-Connell effects  
582       are widespread and strong enough to maintain diversity in grasslands. *Ecology* 89:2399–  
583       2406.

584   Proctor, J., and S. R. J. Woodell. 1975. The ecology of serpentine soils. *Advances in Ecological*  
585       Research 9:255–366.

586   Rajakaruna, N., B. G. Baldwin, R. Chan, A. M. Desrochers, B. A. Bohm, and J. Whitton. 2003.  
587       Edaphic races and phylogenetic taxa in the *Lasthenia californica* complex (Asteraceae:  
588       Heliantheae): an hypothesis of parallel evolution. *Molecular Ecology* 12:1675–1679.

589   Rajakaruna, N., and B. A. Bohm. 1999. The edaphic factor and patterns of variation in *Lasthenia*  
590       *californica* (Asteraceae). *American Journal of Botany* 86:1576–1596.

591   Rascio, N., and F. Navari-Izzo. 2011. Heavy metal hyperaccumulating plants: how and why do  
592       they do it? and what makes them so interesting? *Plant Science* 180:169–181.

593   Romeis, T., A. A. Ludwig, R. Martin, and J. D. G. Jones. 2001. Calcium-dependent protein  
594       kinases play an essential role in a plant defence response. *EMBO Journal* 20:5556–5567.

595   Rossi, J.-P. 2011. rich: an R package to analyse species richness. *Diversity* 3:112–120.

596 Seabloom, E. W., E. T. Borer, K. Gross, A. E. Kendig, C. Lacroix, C. E. Mitchell, E. A.  
597 Mordecai, and A. G. Power. 2015. The community ecology of pathogens: coinfection,  
598 coexistence and community composition. *Ecology Letters* 18:401–415.

599 Sebghati, T. S., J. T. Engle, and W. E. Goldman. 2000. Intracellular parasitism by *Histoplasma*  
600 *capsulatum*: fungal virulence and calcium dependence. *Science* 290:1368–1372.

601 Shaw, B. D., and H. C. Hoch. 2000. Ca<sup>2+</sup> regulation of *Phyllosticta ampellicida* pycnidiospore  
602 germination and appressorium formation. *Fungal Genetics and Biology* 31:43–53.

603 Smith, V. 2007. Host resource supplies influence the dynamics and outcome of infectious  
604 disease. *Integrative and Comparative Biology* 47:310–316.

605 Spear, E. R. 2017. Phylogenetic relationships and spatial distributions of putative fungal  
606 pathogens of seedlings across a rainfall gradient in Panama. *Fungal Ecology* 26:65–73.

607 Spear, E. R., P. D. Coley, and T. A. Kursar. 2015. Do pathogens limit the distributions of tropical  
608 trees across a rainfall gradient? *Journal of Ecology* 103:165–174.

609 Spear, E. R., and E. A. Mordecai. (n.d.). Foliar pathogens do not stabilize coexistence of  
610 competing species in a California grassland. *Ecology*.

611 Spear, E. R., and E. A. Mordecai. 2018. Foliar pathogens do not stabilize coexistence of  
612 competing species in a California grassland. *Ecology* 0:1–10.

613 Sprent, J. F. A. 1992. Parasites lost? *International Journal for Parasitology* 22:139–151.

614 Springer, Y. P. 2009. Do extreme environments provide a refuge from pathogens? A  
615 phylogenetic test using serpentine flax. *American Journal of Botany* 96:2010–2021.

616 Springer, Y. P., B. A. Hardcastle, and G. S. Gilbert. 2006. Soil calcium and plant disease in

617       serpentine ecosystems: A test of the pathogen refuge hypothesis. *Oecologia* 151:10–21.

618   Tadros, T. M. 1957. Evidence of the presence of an edapho-biotic factor in the problem of  
619       serpentine tolerance. *Ecology* 38:14–23.

620   Telfer, S., X. Lambin, R. Birtles, P. Beldomenico, S. Burthe, S. Paterson, and M. Begon. 2010.  
621       Species interactions in a parasite community drive infection risk in a wildlife population.  
622       *Science* 330:243–247.

623   Treutter, D. 2006. Significance of flavonoids in plant resistance: a review. *Environmental*  
624       *Chemistry Letters* 4:147–157.

625   Uhm, K.-H., I.-P. Ahn, S. Kim, and Y.-H. Lee. 2003. Calcium/calmodulin-dependent signaling  
626       for prepenetration development in *Colletotrichum gloeosporioides*. *Phytopathology* 93:82–  
627       87.

628   Uricchio, L. H., S. C. Daws, E. R. Spear, and E. A. Mordecai. 2018. Exotic species dominate due  
629       to niche overlap in a complex grassland community. in review:1–35.

630   Vallano, D. M., P. C. Selmants, and E. S. Zavaleta. 2012. Simulated nitrogen deposition  
631       enhances the performance of an exotic grass relative to native serpentine grassland  
632       competitors. *Plant Ecology* 213:1015–1026.

633   Vavrek, M. J. 2011. Fossil: palaeoecological and palaeogeographical analysis tools.  
634       *Palaeontologia Electronica* 14.

635   Warner, R. R., and P. L. Chesson. 1985. Coexistence mediated by recruitment fluctuations: a  
636       field guide to the storage effect. *The American Naturalist* 125:769–787.

637   Warwar, V., and M. B. Dickman. 1996. Effects of calcium and calmodulin on spore germination  
638       and appressorium development in *Colletotrichum trifolii*. *Applied and Environmental*

Microbiology 62:74–79.

Weather Underground. (n.d.). Jasper Ridge Biological Preserve KCAWOODS19.

<https://www.wunderground.com/personal-weather-station/dashboard?ID=KCAWOODS19>.

Wickham, H. 2016. Ggplot2: elegant graphics for data analysis. Springer-Verlag, New York.

Wolda, H. 1981. Similarity indices, sample size and diversity. *Oecologia* 50:296–302.

Wolf, D. C., T. H. Dao, H. D. Scott, and T. L. Lavy. 1989. Influence of sterilization methods on selected soil microbiological, physical, and chemical properties. *Journal of Environment Quality* 18:39.

## Figure legends

**Figure 1. Pathogen damage was consistently low across three years and both grassland types.** Panel (a) maps the locations of surveyed nonserpentine sites (blue) and serpentine sites (green) along the ridgetop at JRBP. Panel (b) shows mean percentage (bars) and standard error (error bars) of diseased leaf area for surveyed serpentine and nonserpentine *S. pulchra*, by year.

**Figure 2. Pathogens isolated from *Stipa pulchra* growing in nonserpentine and serpentine grasslands.** Bipartite network showing species interactions between *S. pulchra* plants (left) growing in serpentine grasslands (green) and nonserpentine grasslands (blue) and fungal species cultured from symptomatic leaf tissue (white bars on the right). The length of each white bar

correlates with the number of isolates in the operational species unit (based on 97% sequence similarity). The thickness of lines connecting left and right bars represents the number of times a particular fungal species was isolated from *S. pulchra* in a particular grassland type. The nonserpentine fungi came from 15 genera, 8 families, 4 orders, and 3 classes; the serpentine fungi came from 20 genera, 14 families, 7 orders, and 5 classes (Tables S-1 to S-6).

**Figure 3. Distinct fungal communities isolated from *Stipa pulchra* growing in nearby serpentine and nonserpentine sites across years.**

Non-metric multidimensional scaling visualization of serpentine and nonserpentine fungal community similarity. Each point corresponds to the combined fungal community of two transects at the same site in the same year. Serpentine communities are shown in green and nonserpentine communities are shown in blue. Circles, triangles, and squares represent fungal communities sampled in 2015, 2016, and 2017, respectively. Ellipses enclose 95% confidence intervals for ordination of serpentine and nonserpentine communities. Community dissimilarity increases with the distance between points. PERMANOVA analysis showed a significant effect of soil type on fungal community composition ( $F = 3.623$ ,  $R^2 = 0.0618$ ,  $p = 0.001$ ).

**Figure 4. Plants grown in nonserpentine soil had higher C, N, P, Ca, and Ca:Mg and lower Mg and Ni than those grown in serpentine soil.**

Box plots comparing elemental content of dried foliar tissue from nonserpentine- and serpentine-grown *S. pulchra*. In each plot, the thick black bar represents the median, the height of the box represents the interquartile range (IQR), the whiskers represent the maximum and minimum points within  $1.5 \times \text{IQR}$  of the 25<sup>th</sup> and 75<sup>th</sup> percentiles, and the circles represent points outside this range. An asterisk above a panel indicates a statistically significant difference between serpentine- and nonserpentine-grown plants ( $p < 0.05$ ) indicated by a Wilcoxon ranked-sum test. Panel (a) shows percent C of dried foliar tissue ( $W = 2713$ ,  $p\text{-value} = 1.65 \times 10^{-7}$ ); panel (b), percent N ( $W = 2346$ ,  $p\text{-value} =$

0.0011); panel (c), C:N ratio ( $W = 1398$ ,  $p\text{-value} = 0.066$ ); panel (d), moles P per kilogram dried leaf tissue ( $W = 390$ ,  $p\text{-value} = 2.83 \times 10^{-9}$ ); panel (e), moles Ca per kilogram dried leaf tissue ( $W = 400$ ,  $p\text{-value} = 1.45 \times 10^{-11}$ ); panel (f), Ca:Mg ratio ( $W = 400$ ,  $p\text{-value} = 1.451 \times 10^{-11}$ ); panel (g), moles Cr per kilogram dried leaf tissue ( $W = 192.5$ ,  $p\text{-value} = 0.8498$ ); panel (h), moles Mg per kilogram dried leaf tissue ( $W = 1$ ,  $p\text{-value} = 2.90 \times 10^{-11}$ ); and panel (i), moles Ni per kilogram dried leaf tissue ( $W = 0$ ,  $p\text{-value} = 6.79 \times 10^{-8}$ ).

**Figure 5. C, N, and C:N predict the mean foliar pathogen damage with opposite trends in serpentine versus nonserpentine grasslands.** Foliar percent C (Panels (a) and (b)), percent N (Panels (c) and (d)) and C:N ratio (Panels (e) and (f)) versus mean percentage of diseased leaf area for serpentine and nonserpentine *S. pulchra* plants, with linear regression (lines) and 95% confidence intervals (grey bands). An asterisk following a p-value indicates a statistically significant result ( $p < 0.05$ ).

**Figures**

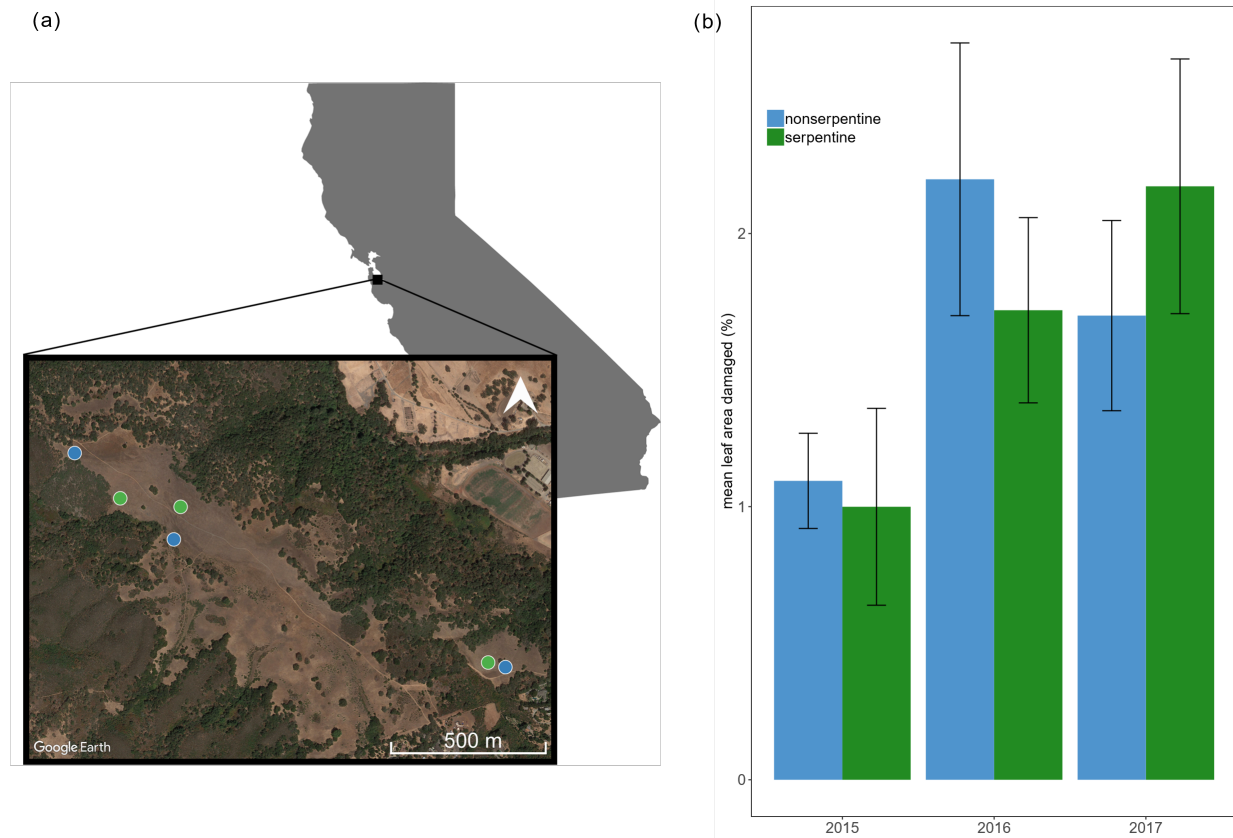

**Figure 1.**



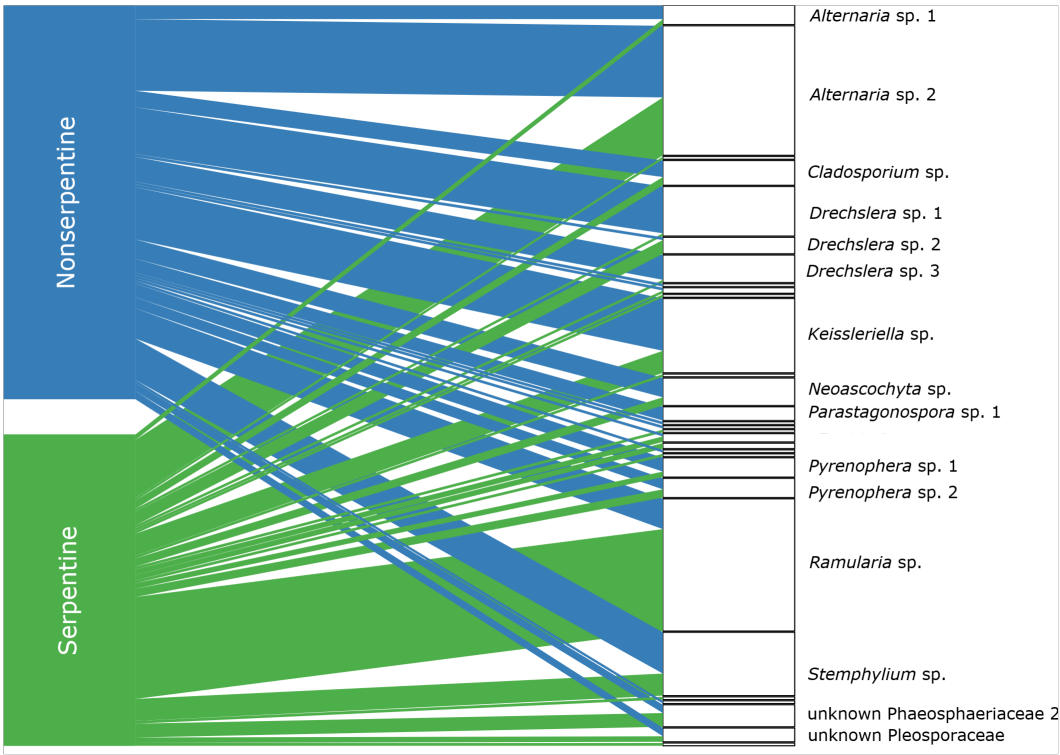

700

701 **Figure 2.**

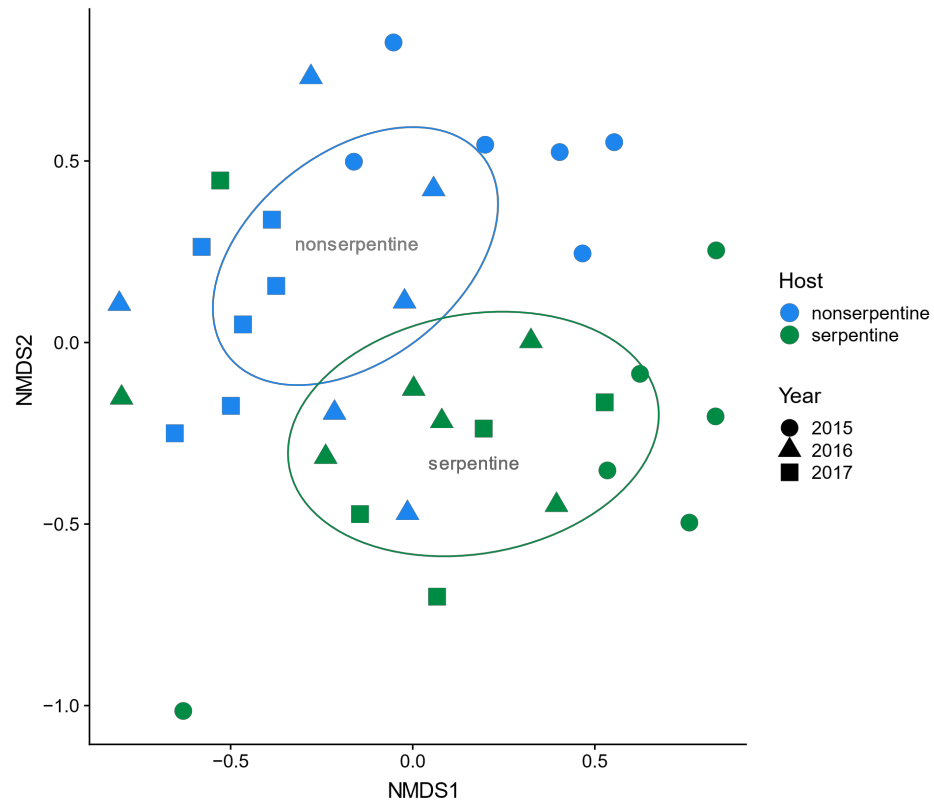

**Figure 3.**

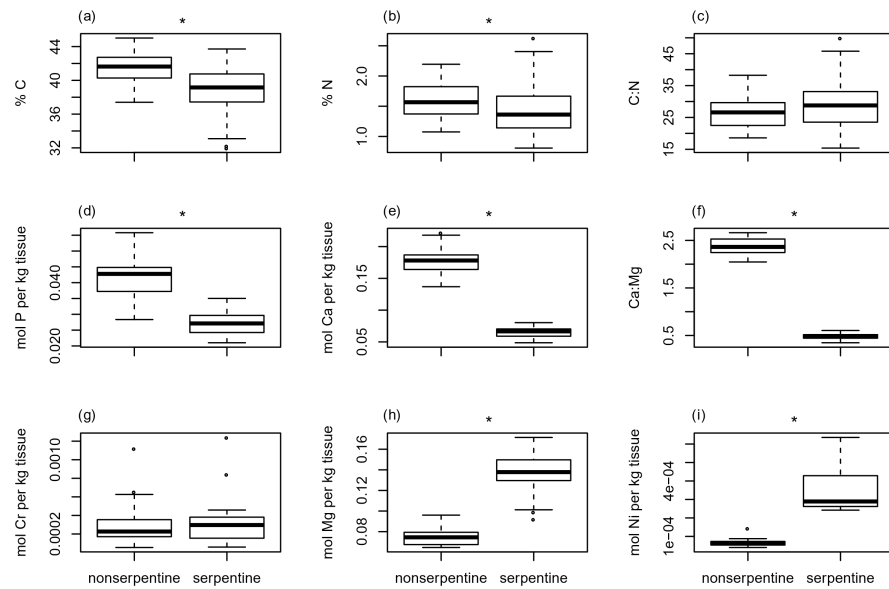

**Figure 4.**

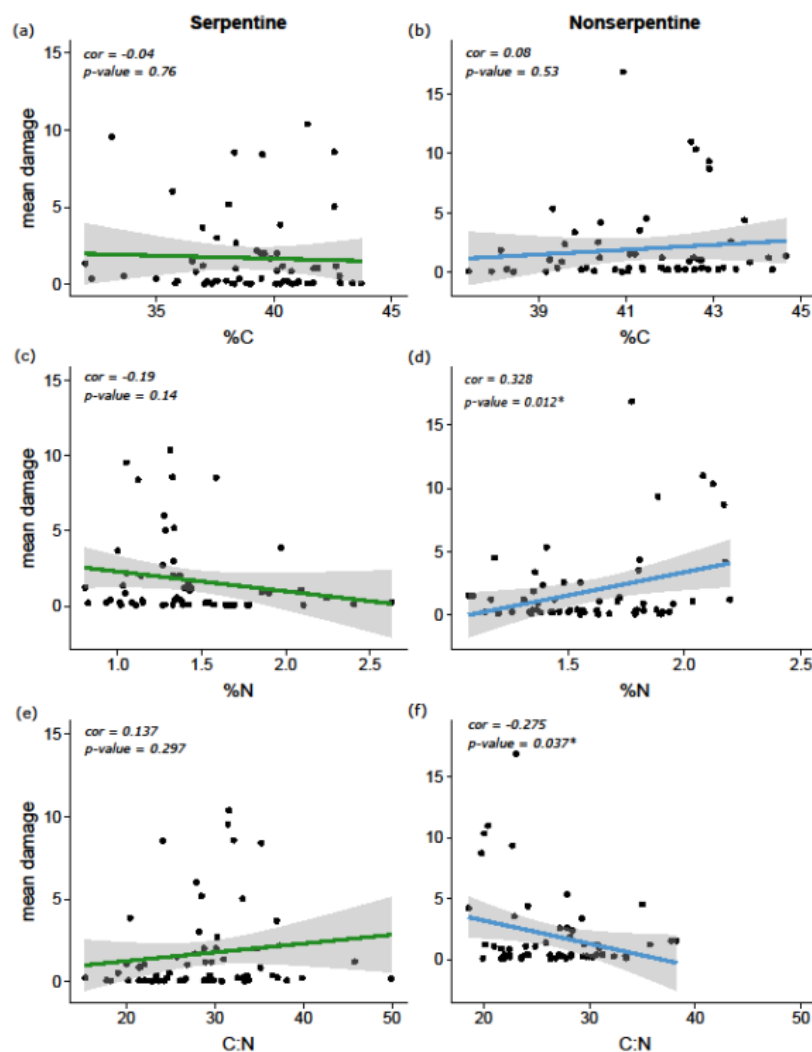

**Figure 5.**

## Tables

**Table 1. Fungal community diversity was higher and communities were distinct in *S. pulchra* plants growing in serpentine versus nonserpentine grasslands, across all years.**

Fungal community similarity by soil type and year. The leftmost column lists the fungal communities considered, with the number of species in each community in parentheses. The second column lists Fisher's alpha for each community. The third column shows the number of shared species and, in parentheses, the percentage of total observed species that were shared for each pair of communities. The rightmost column lists the estimated Morisita-Horn community overlap value, based on absolute species abundances, for each pair of communities. The Morisita-Horn index ranges from 0 to 1, with 1 indicating complete overlap.

| <b>Fungal community pair</b> | <b>Fisher's alpha</b> | <b>Shared species</b> | <b>Morisita-Horn Similarity Index</b> |
|------------------------------|-----------------------|-----------------------|---------------------------------------|
| All years serpentine (24)    | 9.324                 | 16                    | 0.675                                 |
| All years nonserpentine (22) | 7.261                 | (53.0%)               |                                       |
| 2015 serpentine (11)         | 7.955                 | 5                     | 0.535                                 |
| 2015 nonserpentine (12)      | 5.205                 | (27.8%)               |                                       |
| 2016 serpentine (16)         | 7.897                 | 11                    | 0.766                                 |
| 2016 nonserpentine (13)      | 5.861                 | (61.1%)               |                                       |
| 2017 serpentine (12)         | 6.784                 | 8                     | 0.725                                 |
| 2017 nonserpentine (12)      | 5.136                 | (50.0%)               |                                       |
| 2015 serpentine (11)         | 7.955                 | 7                     | 0.707                                 |
| 2016 serpentine (16)         | 7.897                 | (35.0%)               |                                       |
| 2015 serpentine (11)         | 7.955                 | 5                     | 0.721                                 |
| 2017 serpentine (12)         | 6.784                 | (27.8%)               |                                       |
| 2016 serpentine (16)         | 7.897                 | 7                     | 0.786                                 |
| 2017 serpentine (12)         | 6.784                 | (33.3%)               |                                       |
| 2015 nonserpentine (12)      | 5.205                 | 6                     | 0.668                                 |
| 2016 nonserpentine (13)      | 5.861                 | (31.5%)               |                                       |
| 2015 nonserpentine (12)      | 5.205                 | 5                     | 0.295                                 |
| 2017 nonserpentine (12)      | 5.136                 | (26.3%)               |                                       |
| 2016 nonserpentine (13)      | 5.861                 | 7                     | 0.882                                 |
| 2017 nonserpentine (12)      | 5.136                 | (38.9%)               |                                       |
